# Supplementary material
Source: publisher figshare collection journal article supplement (https://sage.figshare.com/ndownloader/files/12370331)
Supplement: Supplementary file 1 [file 12370331]

## Pathway Reconstruction Result for the Supergroups

|                |  |        |  |
|----------------|--|--------|--|
| /share/www//se |  | object |  |
|----------------|--|--------|--|

[Hide all objects](#)

### Metabolism

Global and overview maps

- 01100 [Metabolic pathways](#) (5)

[K01697](#)

SG\_1241, SG\_1241

[K01738](#)

SG\_1241, SG\_1241

[K01760](#)

SG\_711, SG\_711

[K04487](#)

SG\_1634, SG\_1634

[K10251](#)

SG\_843

- 01110 [Biosynthesis of secondary metabolites](#) (3)

[K01738](#)

SG\_1241, SG\_1241

[K01760](#)

SG\_711, SG\_711

[K10251](#)

SG\_843

- 01120 [Microbial metabolism in diverse environments](#) (1)

[K01738](#)

SG\_1241, SG\_1241

- 01130 [Biosynthesis of antibiotics](#) (2)

[K01697](#)

SG\_1241, SG\_1241

[K01738](#)

SG\_1241, SG\_1241

- 01200 [Carbon metabolism](#) (1)

[K01738](#)

SG\_1241, SG\_1241

- 01212 [Fatty acid metabolism](#) (1)

[K10251](#)

SG\_843

- 01230 [Biosynthesis of amino acids](#) (3)

[K01697](#)

SG\_1241, SG\_1241

[K01738](#)

SG\_1241, SG\_1241

K01760  
SG\_711, SG\_711

#### Energy metabolism

- 00190 [Oxidative phosphorylation](#) (1)

K01507  
SG\_1364, SG\_1364

- 00920 [Sulfur metabolism](#) (1)

K01738  
SG\_1241, SG\_1241

#### Lipid metabolism

- 00062 [Fatty acid elongation](#) (1)

K10251  
SG\_843

- 00140 [Steroid hormone biosynthesis](#) (1)

K10251  
SG\_843

- 01040 [Biosynthesis of unsaturated fatty acids](#) (1)

K10251  
SG\_843

#### Amino acid metabolism

- 00260 [Glycine, serine and threonine metabolism](#) (1)

K01697  
SG\_1241, SG\_1241

- 00270 [Cysteine and methionine metabolism](#) (4)

K01697  
SG\_1241, SG\_1241  
K01738  
SG\_1241, SG\_1241  
K01760  
SG\_711, SG\_711  
K01761  
SG\_711

- 00340 [Histidine metabolism](#) (1)

K19787  
SG\_1363, SG\_1363

#### Metabolism of other amino acids

- 00450 [Selenocompound metabolism](#) (2)

K01760  
SG\_711, SG\_711  
K01761  
SG\_711

#### Metabolism of cofactors and vitamins

- 00730 [Thiamine metabolism](#) (1)

K04487  
SG\_1634, SG\_1634

### Genetic Information Processing

#### Translation

- 03010 [Ribosome](#) (2)

K02943  
SG\_1201  
K02977  
SG\_1633, SG\_1633

- 03015 [mRNA surveillance pathway](#) (2)

K04382  
SG\_2464  
K06269  
SG\_565, SG\_565

#### Folding, sorting and degradation

- 04141 [Protein processing in endoplasmic reticulum](#) (3)

K04554  
SG\_1380  
K10578  
SG\_1380  
K13989  
SG\_898

- 04120 [Ubiquitin mediated proteolysis](#) (8)

K03178  
SG\_891  
K04554  
SG\_1380  
K06688  
SG\_847  
K10573  
SG\_847  
K10574  
SG\_847  
K10578  
SG\_1380  
K10579  
SG\_1730  
K10686  
SG\_891

- 04122 [Sulfur relay system](#) (2)

K04487  
SG\_1634, SG\_1634  
K21029  
SG\_891

## **Environmental Information Processing**

Signal transduction

- 04014 Ras signaling pathway (2)

K04371  
SG\_1271  
K07887  
SG\_2010

- 04015 Rap1 signaling pathway (1)

K04371  
SG\_1271

- 04010 MAPK signaling pathway (1)

K04371  
SG\_1271

- 04013 MAPK signaling pathway - fly (2)

K04371  
SG\_1271  
K04382  
SG\_2464

- 04011 MAPK signaling pathway - yeast (2)

K04371  
SG\_1271  
K04563  
SG\_608

- 04012 ErbB signaling pathway (2)

K03083  
SG\_443  
K04371  
SG\_1271

- 04310 Wnt signaling pathway (1)

K03083  
SG\_443

- 04340 Hedgehog signaling pathway (1)

K03083  
SG\_443

- 04341 Hedgehog signaling pathway - fly (1)

[K03083](#)  
SG\_443

- 04350 TGF-beta signaling pathway (2)

[K04371](#)  
SG\_1271  
[K04382](#)  
SG\_2464

- 04390 Hippo signaling pathway (3)

[K03083](#)  
SG\_443  
[K04382](#)  
SG\_2464  
[K06269](#)  
SG\_565, SG\_565

- 04391 Hippo signaling pathway - fly (1)

[K04382](#)  
SG\_2464

- 04370 VEGF signaling pathway (1)

[K04371](#)  
SG\_1271

- 04371 Apelin signaling pathway (1)

[K04371](#)  
SG\_1271

- 04668 TNF signaling pathway (1)

[K04371](#)  
SG\_1271

- 04066 HIF-1 signaling pathway (1)

[K04371](#)  
SG\_1271

- 04068 FoxO signaling pathway (3)

[K02206](#)  
SG\_608  
[K04371](#)  
SG\_1271  
[K11434](#)  
SG\_1305, SG\_1305

- 04072 Phospholipase D signaling pathway (1)

[K04371](#)  
SG\_1271

- 04071 [Sphingolipid signaling pathway](#) (2)

[K04371](#)  
SG\_1271  
[K04382](#)  
SG\_2464

- 04024 [cAMP signaling pathway](#) (2)

[K04371](#)  
SG\_1271  
[K06269](#)  
SG\_565, SG\_565

- 04022 [cGMP-PKG signaling pathway](#) (2)

[K04371](#)  
SG\_1271  
[K06269](#)  
SG\_565, SG\_565

- 04151 [PI3K-Akt signaling pathway](#) (4)

[K02206](#)  
SG\_608  
[K03083](#)  
SG\_443  
[K04371](#)  
SG\_1271  
[K04382](#)  
SG\_2464

- 04152 [AMPK signaling pathway](#) (2)

[K04382](#)  
SG\_2464  
[K07881](#)  
SG\_2010

- 04150 [mTOR signaling pathway](#) (2)

[K03083](#)  
SG\_443  
[K04371](#)  
SG\_1271

## **Cellular Processes**

Transport and catabolism

- 04144 [Endocytosis](#) (3)

[K07887](#)  
SG\_2010  
[K07904](#)  
SG\_1445  
[K18466](#)  
SG\_1187

- 04145 [Phagosome](#) (1)

[K07887](#)  
SG\_2010

- 04140 [Autophagy - animal](#) (2)

[K04371](#)  
SG\_1271  
[K04382](#)  
SG\_2464

- 04138 [Autophagy - yeast](#) (2)

[K04382](#)  
SG\_2464  
[K14209](#)  
SG\_1555

- 04136 [Autophagy - other](#) (1)

[K04382](#)  
SG\_2464

#### Cell growth and death

- 04110 [Cell cycle](#) (2)

[K02206](#)  
SG\_608  
[K03083](#)  
SG\_443

- 04111 [Cell cycle - yeast](#) (2)

[K04382](#)  
SG\_2464  
[K04563](#)  
SG\_608

- 04113 [Meiosis - yeast](#) (3)

[K04382](#)  
SG\_2464  
[K04563](#)  
SG\_608  
[K06269](#)  
SG\_565, SG\_565

- 04114 [Oocyte meiosis](#) (5)

[K02206](#)  
SG\_608  
[K04371](#)  
SG\_1271  
[K04382](#)  
SG\_2464  
[K06269](#)  
SG\_565, SG\_565  
[K11481](#)  
SG\_539

- 04210 Apoptosis (1)

K04371  
SG\_1271

- 04214 Apoptosis - fly (1)

K04371  
SG\_1271

- 04115 p53 signaling pathway (1)

K02206  
SG\_608

- 04218 Cellular senescence (3)

K02206  
SG\_608  
K04371  
SG\_1271  
K06269  
SG\_565, SG\_565

#### Cellular community - eukaryotes

- 04510 Focal adhesion (3)

K03083  
SG\_443  
K04371  
SG\_1271  
K06269  
SG\_565, SG\_565

- 04520 Adherens junction (1)

K04371  
SG\_1271

- 04530 Tight junction (1)

K04382  
SG\_2464

- 04540 Gap junction (1)

K04371  
SG\_1271

- 04550 Signaling pathways regulating pluripotency of stem cells (2)

K03083  
SG\_443  
K04371  
SG\_1271

#### Cell motility



- 04810 Regulation of actin cytoskeleton (2)

K04371  
SG\_1271  
K06269  
SG\_565, SG\_565

## **Organismal Systems**

Immune system

- 04611 Platelet activation (2)

K04371  
SG\_1271  
K06269  
SG\_565, SG\_565

- 04620 Toll-like receptor signaling pathway (1)

K04371  
SG\_1271

- 04621 NOD-like receptor signaling pathway (1)

K04371  
SG\_1271

- 04650 Natural killer cell mediated cytotoxicity (1)

K04371  
SG\_1271

- 04660 T cell receptor signaling pathway (2)

K03083  
SG\_443  
K04371  
SG\_1271

- 04658 Th1 and Th2 cell differentiation (1)

K04371  
SG\_1271

- 04659 Th17 cell differentiation (1)

K04371  
SG\_1271

- 04657 IL-17 signaling pathway (2)

K03083  
SG\_443  
K04371  
SG\_1271

- 04662 B cell receptor signaling pathway (2)

K03083  
SG\_443  
K04371  
SG\_1271

- 04664 Fc epsilon RI signaling pathway (1)

K04371  
SG\_1271

- 04666 Fc gamma R-mediated phagocytosis (1)

K04371  
SG\_1271

- 04062 Chemokine signaling pathway (2)

K03083  
SG\_443  
K04371  
SG\_1271

#### Endocrine system

- 04910 Insulin signaling pathway (3)

K03083  
SG\_443  
K04371  
SG\_1271  
K06269  
SG\_565, SG\_565

- 04922 Glucagon signaling pathway (2)

K11434  
SG\_1305, SG\_1305  
K15423  
SG\_2464, SG\_746

- 04912 GnRH signaling pathway (1)

K04371  
SG\_1271

- 04915 Estrogen signaling pathway (1)

K04371  
SG\_1271

- 04914 Progesterone-mediated oocyte maturation (3)

K02206  
SG\_608  
K04371  
SG\_1271  
K11481  
SG\_539

- 04917 Prolactin signaling pathway (2)

K03083  
SG\_443  
K04371  
SG\_1271

- 04921 Oxytocin signaling pathway (2)

K04371  
SG\_1271  
K06269  
SG\_565, SG\_565

- 04919 Thyroid hormone signaling pathway (2)

K03083  
SG\_443  
K04371  
SG\_1271

- 04916 Melanogenesis (2)

K03083  
SG\_443  
K04371  
SG\_1271

#### Circulatory system

- 04261 Adrenergic signaling in cardiomyocytes (3)

K04371  
SG\_1271  
K04382  
SG\_2464  
K06269  
SG\_565, SG\_565

- 04270 Vascular smooth muscle contraction (2)

K04371  
SG\_1271  
K06269  
SG\_565, SG\_565

#### Digestive system

- 04972 Pancreatic secretion (1)

K07904  
SG\_1445

- 04977 Vitamin digestion and absorption (1)

K14617  
SG\_1143

- 04978 Mineral absorption (1)

K14688  
SG\_721

#### Excretory system

- 04962 Vasopressin-regulated water reabsorption (2)

K07887  
SG\_2010  
K07904  
SG\_1445

- 04960 Aldosterone-regulated sodium reabsorption (1)

K04371  
SG\_1271

- 04961 Endocrine and other factor-regulated calcium reabsorption (1)

K07904  
SG\_1445

#### Nervous system

- 04724 Glutamatergic synapse (1)

K04371  
SG\_1271

- 04725 Cholinergic synapse (1)

K04371  
SG\_1271

- 04728 Dopaminergic synapse (3)

K03083  
SG\_443  
K04382  
SG\_2464  
K06269  
SG\_565, SG\_565

- 04726 Serotonergic synapse (1)

K04371  
SG\_1271

- 04720 Long-term potentiation (2)

K04371  
SG\_1271  
K06269  
SG\_565, SG\_565

- 04730 Long-term depression (2)

[K04371](#)  
SG\_1271  
[K04382](#)  
SG\_2464

- 04723 [Retrograde endocannabinoid signaling](#) (1)

[K04371](#)  
SG\_1271

- 04722 [Neurotrophin signaling pathway](#) (2)

[K03083](#)  
SG\_443  
[K04371](#)  
SG\_1271

#### Sensory system

- 04750 [Inflammatory mediator regulation of TRP channels](#) (1)

[K06269](#)  
SG\_565, SG\_565

#### Development

- 04320 [Dorso-ventral axis formation](#) (1)

[K04371](#)  
SG\_1271

- 04360 [Axon guidance](#) (2)

[K03083](#)  
SG\_443  
[K04371](#)  
SG\_1271

- 04380 [Osteoclast differentiation](#) (1)

[K04371](#)  
SG\_1271

#### Environmental adaptation

- 04713 [Circadian entrainment](#) (1)

[K04371](#)  
SG\_1271

- 04711 [Circadian rhythm - fly](#) (1)

[K03083](#)  
SG\_443

#### **Human Diseases**

Cancers: Overview

- 05200 [Pathways in cancer](#) (3)
  - [K02206](#)
  - SG\_608
  - [K03083](#)
  - SG\_443
  - [K04371](#)
  - SG\_1271
- 05230 [Central carbon metabolism in cancer](#) (1)
  - [K04371](#)
  - SG\_1271
- 05231 [Choline metabolism in cancer](#) (1)
  - [K04371](#)
  - SG\_1271
- 05205 [Proteoglycans in cancer](#) (2)
  - [K04371](#)
  - SG\_1271
  - [K06269](#)
  - SG\_565, SG\_565
- 05203 [Viral carcinogenesis](#) (3)
  - [K02206](#)
  - SG\_608
  - [K04371](#)
  - SG\_1271
  - [K11252](#)
  - SG\_587

#### Cancers: Specific types

- 05210 [Colorectal cancer](#) (2)
  - [K03083](#)
  - SG\_443
  - [K04371](#)
  - SG\_1271
- 05212 [Pancreatic cancer](#) (1)
  - [K04371](#)
  - SG\_1271
- 05214 [Glioma](#) (1)
  - [K04371](#)
  - SG\_1271
- 05216 [Thyroid cancer](#) (1)
  - [K04371](#)
  - SG\_1271

- 05221 [Acute myeloid leukemia](#) (1)  
[K04371](#)  
SG\_1271
- 05220 [Chronic myeloid leukemia](#) (1)  
[K04371](#)  
SG\_1271
- 05217 [Basal cell carcinoma](#) (1)  
[K03083](#)  
SG\_443
- 05218 [Melanoma](#) (1)  
[K04371](#)  
SG\_1271
- 05211 [Renal cell carcinoma](#) (1)  
[K04371](#)  
SG\_1271
- 05219 [Bladder cancer](#) (1)  
[K04371](#)  
SG\_1271
- 05215 [Prostate cancer](#) (3)  
[K02206](#)  
SG\_608  
[K03083](#)  
SG\_443  
[K04371](#)  
SG\_1271
- 05213 [Endometrial cancer](#) (2)  
[K03083](#)  
SG\_443  
[K04371](#)  
SG\_1271
- 05224 [Breast cancer](#) (2)  
[K03083](#)  
SG\_443  
[K04371](#)  
SG\_1271
- 05222 [Small cell lung cancer](#) (1)  
[K02206](#)  
SG\_608

- 05223 [Non-small cell lung cancer](#) (1)

[K04371](#)  
SG\_1271

#### Immune diseases

- 05322 [Systemic lupus erythematosus](#) (1)

[K11252](#)  
SG\_587

#### Neurodegenerative diseases

- 05010 [Alzheimer's disease](#) (2)

[K03083](#)  
SG\_443  
[K04371](#)  
SG\_1271

- 05012 [Parkinson's disease](#) (3)

[K03178](#)  
SG\_891  
[K04554](#)  
SG\_1380  
[K10578](#)  
SG\_1380

- 05014 [Amyotrophic lateral sclerosis \(ALS\)](#) (1)

[K07887](#)  
SG\_2010

- 05020 [Prion diseases](#) (1)

[K04371](#)  
SG\_1271

#### Substance dependence

- 05031 [Amphetamine addiction](#) (1)

[K06269](#)  
SG\_565, SG\_565

- 05034 [Alcoholism](#) (3)

[K04371](#)  
SG\_1271  
[K06269](#)  
SG\_565, SG\_565  
[K11252](#)  
SG\_587

#### Endocrine and metabolic diseases



- 04930 [Type II diabetes mellitus](#) (1)  
[K04371](#)  
SG\_1271
- 04932 [Non-alcoholic fatty liver disease \(NAFLD\)](#) (1)  
[K03083](#)  
SG\_443
- 04931 [Insulin resistance](#) (2)  
[K03083](#)  
SG\_443  
[K06269](#)  
SG\_565, SG\_565
- 04933 [AGE-RAGE signaling pathway in diabetic complications](#) (1)  
[K04371](#)  
SG\_1271

Infectious diseases: Bacterial

- 05132 [Salmonella infection](#) (1)  
[K04371](#)  
SG\_1271
- 05131 [Shigellosis](#) (1)  
[K04371](#)  
SG\_1271
- 05133 [Pertussis](#) (1)  
[K04371](#)  
SG\_1271
- 05134 [Legionellosis](#) (1)  
[K07874](#)  
SG\_2010
- 05152 [Tuberculosis](#) (2)  
[K04371](#)  
SG\_1271  
[K07887](#)  
SG\_2010

Infectious diseases: Viral

- 05166 [HTLV-I infection](#) (1)  
[K03083](#)  
SG\_443

- 05162 Measles (2)

K02206  
SG\_608  
K03083  
SG\_443

- 05164 Influenza A (2)

K03083  
SG\_443  
K04371  
SG\_1271

- 05161 Hepatitis B (2)

K02206  
SG\_608  
K04371  
SG\_1271

- 05160 Hepatitis C (3)

K03083  
SG\_443  
K04371  
SG\_1271  
K04382  
SG\_2464

- 05168 Herpes simplex infection (2)

K02206  
SG\_608  
K06269  
SG\_565, SG\_565

- 05167 Kaposi's sarcoma-associated herpesvirus infection (2)

K03083  
SG\_443  
K04371  
SG\_1271

- 05169 Epstein-Barr virus infection (2)

K02206  
SG\_608  
K03083  
SG\_443

- 05165 Human papillomavirus infection (4)

K02206  
SG\_608  
K03083  
SG\_443  
K04371  
SG\_1271

[K04382](#)  
SG\_2464

Infectious diseases: Parasitic

- 05146 [Amoebiasis](#) (1)

[K07887](#)  
SG\_2010

- 05145 [Toxoplasmosis](#) (1)

[K04371](#)  
SG\_1271

- 05140 [Leishmaniasis](#) (1)

[K04371](#)  
SG\_1271

- 05142 [Chagas disease \(American trypanosomiasis\)](#) (2)

[K04371](#)  
SG\_1271  
[K04382](#)  
SG\_2464

Drug resistance: Antineoplastic

- 01521 [EGFR tyrosine kinase inhibitor resistance](#) (2)

[K03083](#)  
SG\_443  
[K04371](#)  
SG\_1271

- 01524 [Platinum drug resistance](#) (1)

[K04371](#)  
SG\_1271

- 01522 [Endocrine resistance](#) (1)

[K04371](#)  
SG\_1271
